# Supplementary material for: Truncated ASPP2 Drives Initiation and Progression of Invasive Lobular Carcinoma via Distinct Mechanisms
Source: Oxford University Press journal article supplement (doi:10.1158/0008-5472.can-19-3607), 2020-02-14
Supplement: 00085472can193607-sup-232485_2_supp_6052176_q4tby9.xlsx [file 00085472can193607-sup-232485_2_supp_6052176_q4tby9.xlsx]

## Sheet: Sheet1
Classification	Criteria
Classic ILC	Invasive lobular carcinoma, with discohesive epithelial cancer cells lacking E-cadherin, often with single cell filing patterns.
Solid ILC	Invasive lobular carcinoma, with epithelial cancer cells lacking E-cadherin, with solid growth patterns (sheets, nodules, etc.).
Invasive carcinoma	Invasive adenocarcinoma, with cohesive E-cadherin-proficient epithelial cancer cells.
Tubular	Adenocarcinoma, with epithelial cancer cells that form tubular growth patterns.
Squamous	Squamous metaplastic carcinoma, with epithelial cancer cells that have undergone metaplasia towards a squamous cell type.
Sarcomatoid	Sarcomatoid tumor, with cancer cells that are morphologically mesenchymal (polygonal, spindle-shaped, elongated, sometimes forming bundles).
